# Supplementary material for: Subterranean movement inferred by temporary emigration in Barton Springs salamanders (Eurycea sosorum)
Source: PeerJ. 2021 Apr 23;9:e11246. doi: 10.7717/peerj.11246 (PMC8074841; doi:10.7717/peerj.11246)
Supplement: Supplemental Information 3 — Body size (mm) and time intervals between capture (days) for recaptured Barton Springs salamanders at Eliza Spring between 2014 and 2018. Dataset also includes individuals below 15.01 mm. [file peerj-09-11246-s003.xlsx]

## Sheet: Sheet1
size1	size2	size3	size4	size5	interval0	interval1	interval2	interval3	interval4
22.01	23.09	24.99	NA	NA	0	119	383	NA	NA
30.97	32.92	NA	NA	NA	0	241	NA	NA	NA
32.88	32.195	33.94	36.02	NA	0	46.5	47.5	63	NA
32.58	32.365	NA	NA	NA	0	399.5	NA	NA	NA
23.06	25.27	NA	NA	NA	0	307.5	NA	NA	NA
33.15	33.33	NA	NA	NA	0	121	NA	NA	NA
29.86	27.8333	31.93	NA	NA	0	632	46	NA	NA
23.715	27.69	NA	NA	NA	0	744.5	NA	NA	NA
32.58	32.15	NA	NA	NA	0	588	NA	NA	NA
21.505	28.33	NA	NA	NA	0	118	NA	NA	NA
19.055	19.18	NA	NA	NA	0	119.5	NA	NA	NA
24.855	23.98	NA	NA	NA	0	750.5	NA	NA	NA
23.1	28.475	NA	NA	NA	0	681.5	NA	NA	NA
17.915	22.045	29.78	NA	NA	0	119.5	467.5	NA	NA
24.28	26.75	NA	NA	NA	0	399	NA	NA	NA
18.7733	21.5	NA	NA	NA	0	118.5	NA	NA	NA
31.485	31.33	NA	NA	NA	0	308	NA	NA	NA
31.53	31.855	NA	NA	NA	0	120	NA	NA	NA
31.47	31.43	NA	NA	NA	0	119	NA	NA	NA
14.56	23.72	30.46	33.3	NA	0	119	468	267	NA
26.5	27.805	NA	NA	NA	0	118.5	NA	NA	NA
24.46	24.85	NA	NA	NA	0	119.5	NA	NA	NA
19.875	23.22	NA	NA	NA	0	308	NA	NA	NA
24.975	29.4867	30.7733	NA	NA	0	119	387	NA	NA
17.94	18.765	NA	NA	NA	0	119.5	NA	NA	NA
19.87	27.025	NA	NA	NA	0	120.5	NA	NA	NA
20.485	21.82	NA	NA	NA	0	119.5	NA	NA	NA
27.885	28.4967	28.72	NA	NA	0	307.5	92	NA	NA
15.95	25.25	NA	NA	NA	0	118.5	NA	NA	NA
25.29	26.71	NA	NA	NA	0	308.5	NA	NA	NA
30.39	32.01	32.63	34.47	34.91	0	118.5	390	78	157
20.8	21.9633	NA	NA	NA	0	119	NA	NA	NA
23.38	24.9233	28.96	28.06	29.64	0	399	346.5	108.5	272
33.17	32.31	34.185	NA	NA	0	750	100.5	NA	NA
20.175	24.4	NA	NA	NA	0	508.5	NA	NA	NA
14.81	26.48	NA	NA	NA	0	119	NA	NA	NA
29.92	29.845	NA	NA	NA	0	118.5	NA	NA	NA
14.93	25.4467	NA	NA	NA	0	119	NA	NA	NA
21.36	26.325	NA	NA	NA	0	118.5	NA	NA	NA
29.715	31.205	NA	NA	NA	0	118.5	NA	NA	NA
23.01	26.27	31.395	NA	NA	0	853	205.5	NA	NA
24.15	29.53	NA	NA	NA	0	744.5	NA	NA	NA
17.77	17.98	NA	NA	NA	0	119	NA	NA	NA
20	31.01	NA	NA	NA	0	743	NA	NA	NA
29.5	29.85	NA	NA	NA	0	188	NA	NA	NA
29.785	31.86	NA	NA	NA	0	1009	NA	NA	NA
33.52	34.68	36.07	36.6	NA	0	384	84	260	NA
33.15	33.13	NA	NA	NA	0	190	NA	NA	NA
27.145	31.205	31.43	32.7967	36.48	0	388.5	79.5	45	500
26.6867	28.4167	NA	NA	NA	0	189	NA	NA	NA
25.2	28.3767	31.51	32.38	NA	0	190	90	105	NA
31.22	31.76	32.68	31.935	33.67	0	190	201	124.5	44.5
28.3333	30.49	NA	NA	NA	0	188	NA	NA	NA
29.6	32.73	32.26	33.89	NA	0	280	108	238	NA
24.925	29.3167	NA	NA	NA	0	189	NA	NA	NA
23.56	31.19	NA	NA	NA	0	1185	NA	NA	NA
23.24	28.33	NA	NA	NA	0	1007.5	NA	NA	NA
27.125	29.4567	34.28	NA	NA	0	387.5	81	NA	NA
31.33	32.355	32.88	NA	NA	0	280.5	104.5	NA	NA
29.99	31.31	33.19	NA	NA	0	385	344	NA	NA
27.63	29.05	30.11	30.45	31.305	0	280.5	106	82.5	264.5
25.98	34.74	NA	NA	NA	0	1184.5	NA	NA	NA
29.62	30.8767	33.28	NA	NA	0	732	452.5	NA	NA
24.3	28.83	31.035	NA	NA	0	188.5	91	NA	NA
32.795	34.22	35.31	NA	NA	0	279.5	107	NA	NA
29.4	35	34.76	NA	NA	0	279	106.5	NA	NA
30.395	32.12	33.82	32.1767	NA	0	467.5	42	500	NA
30.22	30.31	31.46	NA	NA	0	279.5	107.5	NA	NA
26.68	29.69	32.18	32.455	34.58	0	468	157	107.5	452.5
27.385	29.8	NA	NA	NA	0	624.5	NA	NA	NA
24.47	27.39	NA	NA	NA	0	515	NA	NA	NA
25.31	27.07	NA	NA	NA	0	383	NA	NA	NA
28.04	28.39	27.96	31.96	36.46	0	91	106.5	124.5	678
26.4267	31.83	31.99	33.58	35.29	0	90.5	104.5	344	369
26.69	31.32	NA	NA	NA	0	437	NA	NA	NA
26.71	28.36	29.97	NA	NA	0	201	78	NA	NA
25.4567	31.91	32.4	NA	NA	0	370	66	NA	NA
26.1767	28.29	30.595	31.285	NA	0	279	161.5	103	NA
31.23	32.82	33.3	33.62	32.865	0	92	107	81	161.5
25.0133	28.14	29.3933	30.7167	NA	0	321	52	448	NA
27.38	27.77	31.04	NA	NA	0	196	345	NA	NA
24.82	28.28	NA	NA	NA	0	91.5	NA	NA	NA
27.66	29.75	31.32	33.19	33.93	0	195.5	126	433	155
33.27	32.6667	34.415	NA	NA	0	543	209.5	NA	NA
23.54	28.18	NA	NA	NA	0	370.5	NA	NA	NA
29.79	30.12	31.74	32.005	33.72	0	91	189	46.5	46
32.77	34.94	NA	NA	NA	0	195.5	NA	NA	NA
29.1867	30.865	NA	NA	NA	0	437.5	NA	NA	NA
26.375	29.54	NA	NA	NA	0	370	NA	NA	NA
30.5033	30.2233	31.4	NA	NA	0	198	238	NA	NA
28.01	27.94	29.6267	30.24	31.73	0	91.5	107.5	81	42
31.7	32.98	33.53	NA	NA	0	197.5	82.5	NA	NA
24.925	28.12	28.65	31.14	NA	0	195.5	244	652	NA
25.57	27.96	28.35	NA	NA	0	198.5	81	NA	NA
22.81	27.52	NA	NA	NA	0	372.5	NA	NA	NA
33.96	35.08	34.325	NA	NA	0	90.5	231.5	NA	NA
29.795	31.38	33.04	NA	NA	0	200.5	341	NA	NA
25.34	30.61	30.79	31.56	NA	0	195	84	264.5	NA
28.1	27.04	31.0367	NA	NA	0	543	277.5	NA	NA
30.29	32.455	NA	NA	NA	0	373	NA	NA	NA
24.905	28.04	NA	NA	NA	0	540.5	NA	NA	NA
25.38	29.85	NA	NA	NA	0	278.5	NA	NA	NA
30.45	31.0867	NA	NA	NA	0	198	NA	NA	NA
32.17	32.67	NA	NA	NA	0	435	NA	NA	NA
31.62	30.6233	32.37	32.71	33.49	0	197	81	267	275
26.91	29.74	30.435	NA	NA	0	349	104.5	NA	NA
30.59	32.5	NA	NA	NA	0	658.5	NA	NA	NA
31.93	32.81	NA	NA	NA	0	109	NA	NA	NA
24.16	27.41	27.7	26.06	NA	0	821	82	99.5	NA
26.91	31.75	NA	NA	NA	0	105	NA	NA	NA
34.33	34.235	NA	NA	NA	0	106	NA	NA	NA
30.005	31.65	33.17	NA	NA	0	188.5	48	NA	NA
36.54	35.59	36.64	NA	NA	0	111	78	NA	NA
30.735	31.1733	NA	NA	NA	0	107	NA	NA	NA
30.6	30.925	33	32.88	32.7	0	107.5	238	382	350
33.0833	33.6033	34.45	NA	NA	0	107	344	NA	NA
23.84	25.53	30.43	30.765	NA	0	108.5	79.5	630	NA
27.95	29.29	30.91	NA	NA	0	108	341	NA	NA
26.25	30.1	30.25	33.2933	33.31	0	236	219	207	66.5
33.25	32.33	33	NA	NA	0	188	42	NA	NA
32.83	33.75	35.0867	34.07	36.94	0	105	244	312.5	69.5
31.98	31.23	NA	NA	NA	0	107.5	NA	NA	NA
27.85	31.74	33.44	NA	NA	0	231.5	113.5	NA	NA
31.18	31.13	33.41	33.9	NA	0	105	247	97	NA
30.07	31.67	31.97	NA	NA	0	105	84	NA	NA
29.7	29.905	32.255	32.96	NA	0	232.5	49	169.5	NA
22.36	24.03	27.33	NA	NA	0	111	341.5	NA	NA
29.82	30.1133	NA	NA	NA	0	108	NA	NA	NA
28.65	29.26	NA	NA	NA	0	104	NA	NA	NA
29.57	29.84	NA	NA	NA	0	105	NA	NA	NA
28.56	28.22	NA	NA	NA	0	103.5	NA	NA	NA
20.035	23.3333	32.98	NA	NA	0	106.5	798	NA	NA
34.8	34.4067	NA	NA	NA	0	107	NA	NA	NA
31.705	32.08	NA	NA	NA	0	108	NA	NA	NA
23.6	26.01	30.13	NA	NA	0	105.5	711.5	NA	NA
32.67	33.08	NA	NA	NA	0	106.5	NA	NA	NA
34.1	33.4767	NA	NA	NA	0	106	NA	NA	NA
32.27	34.47	34.49	35.35	NA	0	175	72	97	NA
30.4333	32.66	32.49	35.96	36.5	0	81	260	372	180
35.98	36.34	NA	NA	NA	0	241	NA	NA	NA
33.58	34.6	NA	NA	NA	0	82.5	NA	NA	NA
25.5	32.08	NA	NA	NA	0	713	NA	NA	NA
28.3	29.01	NA	NA	NA	0	132	NA	NA	NA
32.38	33.34	NA	NA	NA	0	241	NA	NA	NA
27.84	29.8	NA	NA	NA	0	126	NA	NA	NA
27.38	32.4067	NA	NA	NA	0	715	NA	NA	NA
29.78	30.75	NA	NA	NA	0	179.5	NA	NA	NA
28.94	31.15	33.59	35.26	NA	0	84	48	212	NA
29.09	31.18	31.75	NA	NA	0	179.5	164.5	NA	NA
31.265	33.59	NA	NA	NA	0	344.5	NA	NA	NA
25.66	25.8	NA	NA	NA	0	244	NA	NA	NA
29.67	33.795	NA	NA	NA	0	244	NA	NA	NA
31.09	34.55	NA	NA	NA	0	238	NA	NA	NA
29.025	32.44	NA	NA	NA	0	339.5	NA	NA	NA
30.95	32.76	31.355	NA	NA	0	79.5	158.5	NA	NA
29.64	32.3133	NA	NA	NA	0	342.5	NA	NA	NA
32.44	34.27	34.41	34.63	NA	0	79.5	163	98	NA
30.75	34.19	NA	NA	NA	0	121.5	NA	NA	NA
28.66	30.8	NA	NA	NA	0	78	NA	NA	NA
33.28	34.44	34.6	NA	NA	0	78	91	NA	NA
34.7	35.49	NA	NA	NA	0	795	NA	NA	NA
22.11	27.34	NA	NA	NA	0	78	NA	NA	NA
15.9	26.93	NA	NA	NA	0	260	NA	NA	NA
19.68	23.56	NA	NA	NA	0	42	NA	NA	NA
32.54	34.79	NA	NA	NA	0	91	NA	NA	NA
32.31	30.52	NA	NA	NA	0	260	NA	NA	NA
28.66	31.12	NA	NA	NA	0	42	NA	NA	NA
34.55	35.67	NA	NA	NA	0	470	NA	NA	NA
31.76	31.12	NA	NA	NA	0	717	NA	NA	NA
16.54	21.85	26.31	NA	NA	0	43.5	47.5	NA	NA
18.385	24.43	29.85	30.89	NA	0	52	60	103	NA
29.635	31.19	NA	NA	NA	0	46	NA	NA	NA
17.95	25.27	NA	NA	NA	0	49	NA	NA	NA
29.56	33.6833	NA	NA	NA	0	49	NA	NA	NA
30.4	32.795	31.45	34.765	NA	0	52	166	371	NA
13.51	18.51	NA	NA	NA	0	50.5	NA	NA	NA
16.42	23.5933	NA	NA	NA	0	49	NA	NA	NA
25.15	28.4	NA	NA	NA	0	46	NA	NA	NA
18.4	22.24	26.1	NA	NA	0	46	66	NA	NA
21.24	26.87	30.71	37.16	36.62	0	49	69	307	70.5
17.9933	21.76	27.5867	29.1067	NA	0	46	69	103	NA
29.97	28.77	NA	NA	NA	0	121	NA	NA	NA
31.31	32.81	NA	NA	NA	0	225	NA	NA	NA
22.55	25.58	30.63	NA	NA	0	55	60	NA	NA
19.64	22.7733	28.14	NA	NA	0	49	166	NA	NA
30.67	30.11	NA	NA	NA	0	115	NA	NA	NA
17.13	22.78	NA	NA	NA	0	47.5	NA	NA	NA
16.63	24.8133	NA	NA	NA	0	49	NA	NA	NA
30.84	32.31	NA	NA	NA	0	47.5	NA	NA	NA
22.04	24.71	30.32	NA	NA	0	116.5	98.5	NA	NA
31.085	34.17	NA	NA	NA	0	220.5	NA	NA	NA
16.59	21.145	25.66	NA	NA	0	46	166	NA	NA
22.62	26.49	NA	NA	NA	0	44.5	NA	NA	NA
23.49	26.32	NA	NA	NA	0	43	NA	NA	NA
21.65	28.93	29.38	NA	NA	0	109	104	NA	NA
20.46	27.7567	NA	NA	NA	0	46	NA	NA	NA
19.76	26.52	32.245	34.32	35.65	0	66	104.5	276	351.5
25.69	29.96	NA	NA	NA	0	66	NA	NA	NA
13.09	20.055	NA	NA	NA	0	69	NA	NA	NA
26.9167	31.08	NA	NA	NA	0	63	NA	NA	NA
15.085	27.32	NA	NA	NA	0	448	NA	NA	NA
16.165	23.55	NA	NA	NA	0	61.5	NA	NA	NA
16.01	23.37	NA	NA	NA	0	61.5	NA	NA	NA
26.145	31.65	NA	NA	NA	0	61.5	NA	NA	NA
30.81	35.03	NA	NA	NA	0	63	NA	NA	NA
19.08	27.445	NA	NA	NA	0	61.5	NA	NA	NA
18.12	26.49	29.45	NA	NA	0	60	103	NA	NA
28.16	31.51	NA	NA	NA	0	101	NA	NA	NA
15.89	22.71	NA	NA	NA	0	105	NA	NA	NA
17.34	24.265	NA	NA	NA	0	106.5	NA	NA	NA
22.9367	24.81	28.3	NA	NA	0	107	364	NA	NA
37.9833	37.15	NA	NA	NA	0	107	NA	NA	NA
30.09	33.75	36.73	NA	NA	0	106	366	NA	NA
34	35.18	36.35	NA	NA	0	105	452	NA	NA
30.2633	31.51	33.67	NA	NA	0	100	279	NA	NA
22.2933	27.96	NA	NA	NA	0	103	NA	NA	NA
18.875	25.745	NA	NA	NA	0	101	NA	NA	NA
28.45	30.85	NA	NA	NA	0	103	NA	NA	NA
18.2867	25.33	28.07	NA	NA	0	100	370	NA	NA
19.575	28.3	NA	NA	NA	0	98.5	NA	NA	NA
20.61	27.27	NA	NA	NA	0	100.5	NA	NA	NA
27.74	31.47	NA	NA	NA	0	98.5	NA	NA	NA
23.87	29.73	NA	NA	NA	0	103	NA	NA	NA
30.405	32.8	NA	NA	NA	0	98.5	NA	NA	NA
17.16	22.93	NA	NA	NA	0	100.5	NA	NA	NA
25.445	28.9167	NA	NA	NA	0	101.5	NA	NA	NA
20.49	26.525	32.44	33.11	NA	0	100.5	275.5	175	NA
18.55	26.59	NA	NA	NA	0	97	NA	NA	NA
29.55	32.05	NA	NA	NA	0	279	NA	NA	NA
25.345	29.43	30.75	NA	NA	0	369	259	NA	NA
30.065	30.33	NA	NA	NA	0	450.5	NA	NA	NA
27.87	29.785	NA	NA	NA	0	273.5	NA	NA	NA
26.85	27.66	NA	NA	NA	0	75	NA	NA	NA
23.5167	23.98	NA	NA	NA	0	65	NA	NA	NA
30.06	32.915	NA	NA	NA	0	67	NA	NA	NA
25.835	30.67	NA	NA	NA	0	68	NA	NA	NA
25.1367	29.89	NA	NA	NA	0	243	NA	NA	NA
23.41	28.01	NA	NA	NA	0	65	NA	NA	NA
25.7167	33.24	NA	NA	NA	0	418	NA	NA	NA
25.02	24.2	NA	NA	NA	0	343	NA	NA	NA
23.43	27.93	NA	NA	NA	0	65	NA	NA	NA
18.6367	27.2333	NA	NA	NA	0	68	NA	NA	NA
22.2233	27.8	NA	NA	NA	0	68	NA	NA	NA
25.88	30.35	31.78	NA	NA	0	64	90	NA	NA
17.06	25.63	NA	NA	NA	0	65	NA	NA	NA
13.9767	25.51	NA	NA	NA	0	88	NA	NA	NA
14.4967	24.12	NA	NA	NA	0	89	NA	NA	NA
22.365	30.29	NA	NA	NA	0	87	NA	NA	NA
18.46	26.46	NA	NA	NA	0	87	NA	NA	NA
19.1033	25	NA	NA	NA	0	87	NA	NA	NA
22.6633	27.94	NA	NA	NA	0	87	NA	NA	NA
24.7	29.64	NA	NA	NA	0	87	NA	NA	NA
23.6267	30.97	NA	NA	NA	0	88	NA	NA	NA
29.545	30.88	NA	NA	NA	0	271.5	NA	NA	NA
33.63	34.08	NA	NA	NA	0	347	NA	NA	NA
18.8167	28.08	NA	NA	NA	0	88	NA	NA	NA
31.52	30.34	NA	NA	NA	0	348.5	NA	NA	NA
19.84	26.57	NA	NA	NA	0	88.5	NA	NA	NA
18.105	27.81	NA	NA	NA	0	87	NA	NA	NA
21.105	27.68	NA	NA	NA	0	91	NA	NA	NA
23.53	29.1	NA	NA	NA	0	89	NA	NA	NA
17.95	24.0967	NA	NA	NA	0	90.5	NA	NA	NA
17.84	26.97	NA	NA	NA	0	87	NA	NA	NA
22.95	27.75	NA	NA	NA	0	90	NA	NA	NA
14.725	23.99	NA	NA	NA	0	85.5	NA	NA	NA
17.265	22.805	NA	NA	NA	0	86.5	NA	NA	NA
21.42	28.93	NA	NA	NA	0	86.5	NA	NA	NA
17.265	24.81	NA	NA	NA	0	85.5	NA	NA	NA
28.745	38.88	NA	NA	NA	0	85.5	NA	NA	NA
19.71	27.78	NA	NA	NA	0	86	NA	NA	NA
22.2	30.96	NA	NA	NA	0	182	NA	NA	NA
13.66	22.45	NA	NA	NA	0	86	NA	NA	NA
13.6533	21.48	NA	NA	NA	0	84.5	NA	NA	NA
16.49	24.47	NA	NA	NA	0	83	NA	NA	NA
16.3533	24.14	30.86	NA	NA	0	83	102.5	NA	NA
16.3233	22.11	NA	NA	NA	0	84.5	NA	NA	NA
17.22	25.56	NA	NA	NA	0	86	NA	NA	NA
18.5033	25.78	NA	NA	NA	0	84.5	NA	NA	NA
16.935	23.59	NA	NA	NA	0	86	NA	NA	NA
28.19	29.46	NA	NA	NA	0	85	NA	NA	NA
17.8233	24.53	NA	NA	NA	0	84.5	NA	NA	NA
16.1633	22.91	NA	NA	NA	0	84.5	NA	NA	NA
20.0967	28.05	NA	NA	NA	0	83	NA	NA	NA
16.58	25.29	NA	NA	NA	0	85	NA	NA	NA
19	24.81	NA	NA	NA	0	84.5	NA	NA	NA
16.2033	22.69	27.66	NA	NA	0	86	94	NA	NA
18.77	26.03	NA	NA	NA	0	84	NA	NA	NA
11.95	19.43	NA	NA	NA	0	84.5	NA	NA	NA
19.11	24.87	NA	NA	NA	0	85	NA	NA	NA
15.99	20.26	NA	NA	NA	0	88.5	NA	NA	NA
14.68	22.31	NA	NA	NA	0	88	NA	NA	NA
19.8433	26.63	NA	NA	NA	0	86	NA	NA	NA
21.99	28.34	NA	NA	NA	0	85	NA	NA	NA
14.735	23.22	NA	NA	NA	0	84	NA	NA	NA
11.19	20.1	NA	NA	NA	0	86	NA	NA	NA
14.6533	25.2	NA	NA	NA	0	86	NA	NA	NA
10.95	17.44	NA	NA	NA	0	84.5	NA	NA	NA
10.46	14.6	NA	NA	NA	0	86	NA	NA	NA
14.17	21.49	NA	NA	NA	0	85	NA	NA	NA
14.7333	23.17	NA	NA	NA	0	86	NA	NA	NA
15.36	22.22	28.09	NA	NA	0	85	98	NA	NA
13.62	21.74	NA	NA	NA	0	84.5	NA	NA	NA
19.9433	27.19	NA	NA	NA	0	86	NA	NA	NA
15.1333	23.61	NA	NA	NA	0	83	NA	NA	NA
13.53	19.07	NA	NA	NA	0	85	NA	NA	NA
17.06	23.95	NA	NA	NA	0	82	NA	NA	NA
13.5	22.12	NA	NA	NA	0	82	NA	NA	NA
14.885	21.08	NA	NA	NA	0	85	NA	NA	NA
16.05	23.73	NA	NA	NA	0	82	NA	NA	NA
19.46	24.53	NA	NA	NA	0	83	NA	NA	NA
18.925	24.48	NA	NA	NA	0	82	NA	NA	NA
18.305	26.72	NA	NA	NA	0	82	NA	NA	NA
14.37	21.68	NA	NA	NA	0	88	NA	NA	NA
17.615	26.23	NA	NA	NA	0	85	NA	NA	NA
16.675	25.5	NA	NA	NA	0	85	NA	NA	NA
20.39	25.04	NA	NA	NA	0	85	NA	NA	NA
17.94	25.29	NA	NA	NA	0	82	NA	NA	NA
22.045	29.74	NA	NA	NA	0	180	NA	NA	NA
19.435	24.47	NA	NA	NA	0	82	NA	NA	NA
17.885	24.3	NA	NA	NA	0	85	NA	NA	NA
24.35	26.76	NA	NA	NA	0	81	NA	NA	NA
21.93	28.92	NA	NA	NA	0	81	NA	NA	NA
20.05	24.69	NA	NA	NA	0	82.5	NA	NA	NA
14.65	21.98	NA	NA	NA	0	87	NA	NA	NA
17.91	26.92	NA	NA	NA	0	95	NA	NA	NA
18.58	25.4	NA	NA	NA	0	95	NA	NA	NA
18.38	27.52	NA	NA	NA	0	96.5	NA	NA	NA
14.97	24.31	NA	NA	NA	0	95	NA	NA	NA
21	30.05	NA	NA	NA	0	96.5	NA	NA	NA
17.91	26.71	NA	NA	NA	0	95	NA	NA	NA
20.18	27.57	27.07	NA	NA	0	95	80	NA	NA
17.28	27.8	NA	NA	NA	0	96.5	NA	NA	NA
18.4	27.06	NA	NA	NA	0	95	NA	NA	NA
16.99	26.42	NA	NA	NA	0	98	NA	NA	NA
15.75	25.56	NA	NA	NA	0	95	NA	NA	NA
15.95	22.94	NA	NA	NA	0	95	NA	NA	NA
14.57	23.94	NA	NA	NA	0	95	NA	NA	NA
15.72	26.73	NA	NA	NA	0	95	NA	NA	NA
16.36	24.3	NA	NA	NA	0	96.5	NA	NA	NA
14.61	24.85	NA	NA	NA	0	96.5	NA	NA	NA
15.04	24.32	NA	NA	NA	0	99.5	NA	NA	NA
18.33	26.235	NA	NA	NA	0	175	NA	NA	NA
12.78	25.74	NA	NA	NA	0	95	NA	NA	NA
17.11	25.18	NA	NA	NA	0	96.5	NA	NA	NA
16.01	25.51	NA	NA	NA	0	95	NA	NA	NA
15.45	25.08	NA	NA	NA	0	95	NA	NA	NA
14.37	26.86	NA	NA	NA	0	95	NA	NA	NA
17.97	24.76	NA	NA	NA	0	95	NA	NA	NA
18.87	26.53	NA	NA	NA	0	93.5	NA	NA	NA
16.86	25.99	NA	NA	NA	0	93.5	NA	NA	NA
18.92	23.83	NA	NA	NA	0	93.5	NA	NA	NA
17.48	21.39	NA	NA	NA	0	93.5	NA	NA	NA
16.28	27.36	NA	NA	NA	0	173.5	NA	NA	NA
19.25	26.24	NA	NA	NA	0	93.5	NA	NA	NA
19.58	21.88	NA	NA	NA	0	172	NA	NA	NA
15.28	26.16	NA	NA	NA	0	99.5	NA	NA	NA
17.17	25.12	NA	NA	NA	0	92	NA	NA	NA
19.85	26.81	NA	NA	NA	0	92	NA	NA	NA
15.01	20.32	NA	NA	NA	0	74	NA	NA	NA
20.24	27.21	NA	NA	NA	0	74	NA	NA	NA
20.15	24.945	NA	NA	NA	0	75.5	NA	NA	NA
18.66	24.48	NA	NA	NA	0	74	NA	NA	NA
16.66	21.51	NA	NA	NA	0	74	NA	NA	NA
15.33	20.08	NA	NA	NA	0	74	NA	NA	NA
14.25	20.39	NA	NA	NA	0	74	NA	NA	NA
11.83	20.8	NA	NA	NA	0	77	NA	NA	NA
14.91	22.52	NA	NA	NA	0	77	NA	NA	NA
18.48	27.19	NA	NA	NA	0	77	NA	NA	NA
17.05	23.03	NA	NA	NA	0	75.5	NA	NA	NA
17.25	21.67	NA	NA	NA	0	72.5	NA	NA	NA
15.6	22.47	NA	NA	NA	0	72.5	NA	NA	NA
20.1	24.16	NA	NA	NA	0	72.5	NA	NA	NA
